# Supplementary material
Source: MDPI journal article supplement (https://www.mdpi.com/2075-163X/10/8/668)
Supplement: s1 [file s1]

## Sheet: Table S1. Type1a
Table S1. EPMA analysis of phengite
Type	Type 1a - Polycrystalline aggregate type (n=30)																																Type 1a (n=30)
No.	1	2	3	4	5	6	7	8	9	10	11	12	13	14	15	16	17	18	19	20	21	22	23	24	25	26	27	28	29	30			Min.	Max.	Average
Chemical composition (wt. %)																																Chemical composition (wt. %)
SiO2	47.992	47.831	45.544	45.035	45.072	45.332	47.446	46.344	46.887	46.8	46.515	46.406	45.188	45.952	45.441	45.885	45.935	45.736	46.156	45.119	44.872	44.566	44.703	45.017	45.953	45.885	44.688	44.667	44.504	45.153		SiO2	44.504	47.992	45.7541
TiO2	0.01	0	0.02	0	0	0.013	0.003	0.009	0.012	0.021	0	0	0	0.004	0.018	0	0.007	0	0.003	0	0.01	0.009	0	0.024	0	0	0	0	0.028	0.017		TiO2	0	0.028	0.00693333
Al2O3	31.952	32.872	35.809	36.683	36.369	35.892	31.886	33.959	33.182	33.44	33.432	35.606	36.134	36.446	36.203	36.309	36.5	36.17	36.87	35.906	35.21	34.102	35.487	33.161	32.733	33.208	35.956	36.154	30.456	32.915		Al2O3	30.456	36.87	34.7001
FeO	0.195	0.165	0.121	0.051	0.15	0.073	0.144	0.104	0.313	0.302	0.31	0.247	0.029	0.005	0.02	0	0	0.013	0.021	0.015	0.063	0.093	0.098	0.097	0.372	0.327	0.017	0.018	0.101	0.127		FeO	0	0.372	0.1197
MnO	0.002	0	0.004	0.012	0	0	0.039	0.005	0	0	0	0	0	0	0.016	0	0	0.008	0	0.021	0.017	0.014	0.006	0.009	0	0.001	0	0	0.014	0.008		MnO	0	0.039	0.00586667
MgO	1.846	1.418	0.266	0.037	0.298	0.023	1.983	0.943	1.056	0.831	0.849	0.226	0	0	0	0	0	0	0	0	0.604	0.662	0.187	0.995	0.907	0.78	0	0	1.93	0.854		MgO	0	1.983	0.5565
CaO	0.041	0.088	0.001	0	0.007	0.016	0	0	0	0	0	0.043	0	0	0	0	0	0.002	0	0	0.001	0.026	0.025	0.009	0	0	0.005	0.037	0.055	0.047		CaO	0	0.088	0.0134333
Na2O	0.06	0.086	0.07	0.077	0.035	0.062	0.061	0.031	0.067	0.058	0.057	0.07	0.114	0.048	0.084	0.079	0.046	0.107	0.061	0.079	0.075	0.076	0.091	0.075	0.06	0.037	0.09	0.087	0.035	0.018		Na2O	0.018	0.114	0.0665333
K2O	11.204	11.473	11.254	11.583	11.256	11.233	11.213	11.265	11.256	11.26	11.131	11.38	11.17	11.328	11.272	11.228	11.335	11.16	11.437	11.262	11.274	10.898	11.02	11.093	11.23	11.265	11.19	11.108	10.857	10.877		K2O	10.857	11.583	11.2171
Sum	93.302	93.933	93.089	93.478	93.187	92.644	92.775	92.66	92.773	92.712	92.294	93.978	92.635	93.783	93.054	93.501	93.823	93.196	94.548	92.402	92.126	90.446	91.617	90.48	91.255	91.503	91.946	92.071	87.98	90.016		Sum	87.98	94.548	92.4402
Structural formula (O=11)																																Structural formula (O=11)
Si(IV)	3.24567	3.21754	3.08922	3.04869	3.0561	3.08814	3.22987	3.15756	3.19287	3.18804	3.18173	3.11879	3.07753	3.08935	3.08146	3.09278	3.08699	3.09298	3.07951	3.08257	3.08037	3.11131	3.08003	3.14556	3.18599	3.17173	3.06874	3.0618	3.20207	3.16535		Si(IV)	3.04869	3.24567	3.12568
Al(IV)	0.754327	0.78246	0.910783	0.951313	0.943896	0.911858	0.770134	0.842441	0.807127	0.811963	0.818265	0.881214	0.922474	0.910653	0.918542	0.907216	0.913009	0.907021	0.920494	0.917435	0.919629	0.888688	0.91997	0.854442	0.814006	0.828269	0.931259	0.938205	0.79793	0.83465		Al(IV)	0.754327	0.951313	0.874322
Sum(IV)	4	4	4	4	4	4	4	4	4	4	4	4	4	4	4	4	4	4	4	4	4	4	4	4	4	4	4	4	4	4		Sum(IV)	4	4	4
Al(VI)	1.79244	1.82367	1.95185	1.97542	1.96246	1.96982	1.7881	1.88445	1.85597	1.87276	1.87692	1.93905	1.97788	1.97715	1.97486	1.97714	1.97794	1.97583	1.97873	1.97375	1.92909	1.91723	1.96169	1.87645	1.86068	1.87708	1.97876	1.98259	1.78469	1.88482		Al(VI)	1.78469	1.98259	1.91864
Ti(VI)	0.000508787	0	0.00102058	0	0	0.000666248	0.000153641	0.000461318	0.000614767	0.00107621	0	0	0	0.000202312	0.000918293	0	0.000353908	0	0.000150582	0	0.000516449	0.000472697	0	0.00126163	0	0	0	0	0.00151562	0.00089657		Ti(VI)	0	0.00151562	0.000359654
Fe(VI)	0.0110291	0.00928253	0.0068639	0.00288736	0.00850591	0.00415895	0.00819814	0.00592597	0.0178255	0.0172049	0.0177338	0.0138828	0.00165175	0.000281126	0.00113424	0	0	0.000735242	0.00117176	0.000857062	0.0036169	0.00542989	0.00564693	0.00566841	0.0215696	0.0189035	0.000976307	0.00103188	0.00607745	0.00744572		Fe(VI)	0	0.0215696	0.00685655
Mn(VI)	0.000114565	0	0.000229807	0.000688065	0	0	0.00224872	0.000288545	0	0	0	0	0	0	0.000918996	0	0	0.000458241	0	0.00121523	0.000988467	0.000827853	0.000350151	0.000532659	0	5.85479e-05	0	0	0.000853189	0.000475018		Mn(VI)	0	0.00224872	0.000341602
Mg(VI)	0.186113	0.1422	0.0268972	0.00373399	0.0301222	0.00233576	0.201241	0.0957807	0.107202	0.0843892	0.0865739	0.0226427	0	0	0	0	0	0	0	0	0.061812	0.068898	0.0192074	0.103646	0.0937448	0.0803764	0	0	0.207013	0.0892486		Mg(VI)	0	0.207013	0.0571059
Sum(VI)	1.99021	1.97515	1.98686	1.98273	2.00108	1.97698	1.99994	1.98691	1.98161	1.97543	1.98123	1.97558	1.97953	1.97764	1.97783	1.97714	1.97829	1.97703	1.98005	1.97582	1.99602	1.99286	1.9869	1.98756	1.97599	1.97642	1.97974	1.98362	2.00015	1.98289		Sum(VI)	1.97515	2.00108	1.98331
Ca	0.00297093	0.00634264	7.26759e-05	0	0.000508549	0.00116785	0	0	0	0	0	0.00309637	0	0	0	0	0	0.000144918	0	0	7.35531e-05	0.00194485	0.00184557	0.000673809	0	0	0.000367885	0.00271747	0.00424002	0.00353026		Ca	0	0.00634264	0.000989912
Na	0.00786744	0.0112166	0.0092058	0.0101065	0.00460125	0.00818899	0.00805121	0.00409511	0.00884607	0.00766041	0.00755949	0.00912128	0.0150532	0.00625677	0.0110442	0.0103241	0.00599371	0.0140297	0.00789095	0.0104647	0.00998241	0.0102873	0.0121564	0.0101608	0.00806545	0.00495877	0.0119828	0.0115626	0.00488254	0.00244655		Na	0.00244655	0.0150532	0.0088021
K	0.966646	0.984578	0.973829	1.00033	0.973652	0.976218	0.97379	0.979147	0.977849	0.978531	0.971323	0.975691	0.970488	0.97157	0.975142	0.965472	0.971788	0.962812	0.973472	0.981583	0.987334	0.970611	0.968631	0.988846	0.993275	0.99338	0.980298	0.971368	0.996552	0.972753		K	0.962812	1.00033	0.977565
Sum(I)	0.977484	1.00214	0.983107	1.01043	0.978762	0.985574	0.981841	0.983242	0.986695	0.986191	0.978883	0.987908	0.985542	0.977827	0.986186	0.975796	0.977782	0.976987	0.981363	0.992047	0.99739	0.982843	0.982633	0.999681	1.00134	0.998339	0.992648	0.985648	1.00567	0.97873		Sum(I)	0.975796	1.01043	0.987357

## Sheet: Table S1. Type1b
Table S1. (continued)
Type	Type 1b - Polycrystalline aggregate type (n=50)
No.	1	2	3	4	5	6	7	8	9	10	11	12	13	14	15	16	17	18	19	20	21	22	23	24	25	26	27	28	29	30	31	32	33	34	35	36	37	38	39	40	41	42	43	44	45	46	47	48	49
Chemical composition (wt. %)
SiO2	53.017	51.909	52.046	52.339	51.993	52.326	55.855	52.262	52.662	51.769	53.101	52.42	52.769	52.138	52.008	51.055	53.035	52.994	53.896	51.69	54.501	52.254	52.818	52.795	53.59	53.692	53.719	54.253	53.52	52.93	52.538	51.724	52.117	53.005	53.016	53.011	53.293	52.468	53.653	53.003	52.64	54.019	52.899	52.658	53.003	53.465	53.047	53.012	53.687
TiO2	0.021	0.04	0.027	0.056	0.022	0	0.001	0.01	0.016	0	0.003	0	0	0.027	0.001	0.006	0	0	0	0.028	0	0.013	0.048	0.006	0	0.171	0.009	0	0.025	0	0	0	0	0	0	0	0	0.006	0	0.019	0	0	0.016	0.004	0.033	0.015	0.192	0.418	0.01
Al2O3	23.875	24.147	24.056	23.742	24.593	24.5	21.046	24.217	23.99	24.884	25.068	25.169	25.225	25.455	25.952	25.857	23.525	23.022	23.096	25.134	22.998	23.448	24.248	23.092	22.222	23.588	22.182	23.923	23.866	22.933	24.855	25.919	23.937	22.801	22.704	23.59	23.244	23.504	22.292	24.963	24.587	23.442	24.736	24.515	23.05	23.242	24.193	24.358	21.754
FeO	0.299	0.269	0.262	0.305	0.277	0.269	0.2	0.271	0.267	0.321	0.303	0.279	0.273	0.235	0.211	0.25	0.29	0.298	0.27	0.352	0.28	0.276	0.292	0.303	0.328	0.305	0.266	0.207	0.245	0.237	0.317	0.281	0.281	0.311	0.289	0.288	0.337	0.325	0.255	0.26	0.265	0.305	0.259	0.261	0.291	0.301	0.26	0.263	0.301
MnO	0	0	0.003	0	0	0.005	0.021	0	0.005	0	0.003	0	0	0	0.011	0	0	0.02	0.026	0.007	0	0.01	0	0	0	0.011	0	0.007	0	0	0	0	0	0.008	0.012	0	0.017	0.031	0.003	0	0	0	0	0	0	0	0.003	0.017	0.011
MgO	5.393	5.41	5.509	5.638	5.137	5.289	6.179	4.945	5.465	4.782	4.704	4.773	4.42	4.488	4.42	4.461	5.286	5.379	5.608	5.273	5.825	5.886	5.048	6.092	6.413	5.925	6.001	5.091	4.953	5.8	4.824	4.185	5.28	5.781	5.837	5.684	5.589	5.505	5.821	4.947	5.296	5.553	5.259	5.201	5.977	5.559	5.246	4.88	6.266
CaO	0	0.003	0.01	0.004	0	0.015	0.008	0.014	0.041	0.022	0.15	0.201	0.13	0.006	0.001	0	0.026	0.019	0.01	0	0	0.011	0.014	0.055	0.14	0.027	0.004	0.036	0.045	0.036	0.036	0.047	0.034	0.029	0.034	0.082	0.053	0.03	0.005	0	0.003	0	0	0	0.012	0.046	0.036	0.015	0.044
Na2O	0.053	0.061	0.017	0.032	0.048	0.034	0.072	0.051	0.042	0.052	0.056	0.029	0.051	0.033	0.004	0.013	0.021	0.051	0.024	0.096	0.07	0.034	0.044	0.044	0.07	0.078	0.033	0.072	0.057	0.033	0.093	0.071	0.057	0.05	0.043	0.051	0.064	0.066	0.025	0.088	0.048	0.041	0.054	0.021	0.032	0.065	0.093	0.097	0.092
K2O	11.327	11.175	11.267	11.265	11.286	11.287	11.488	11.286	11.274	11.311	11.274	11.219	11.238	11.313	11.397	11.377	11.319	11.257	11.407	11.499	11.455	11.495	11.323	11.434	11.168	11.455	11.365	11.489	11.526	11.215	11.237	11.2	11.321	11.271	11.215	11.241	11.226	11.187	11.283	11.344	11.337	11.446	11.4	11.42	11.463	11.28	11.414	11.674	11.13
Sum	93.985	93.014	93.197	93.381	93.356	93.725	94.87	93.056	93.762	93.141	94.662	94.09	94.106	93.695	94.005	93.019	93.502	93.04	94.337	94.079	95.129	93.427	93.835	93.821	93.931	95.252	93.579	95.078	94.237	93.184	93.9	93.427	93.027	93.256	93.15	93.947	93.823	93.122	93.337	94.624	94.176	94.806	94.623	94.08	93.861	93.973	94.484	94.734	93.295
Structural formula (O=11)
Si(IV)	3.5595	3.52366	3.52727	3.54043	3.51669	3.52413	3.70748	3.54399	3.54497	3.51051	3.53583	3.51418	3.53278	3.50863	3.48948	3.46757	3.57796	3.59342	3.6031	3.4788	3.61257	3.54	3.55079	3.55952	3.60233	3.56112	3.62254	3.595	3.58291	3.58359	3.52886	3.49044	3.53946	3.58863	3.59199	3.5611	3.58358	3.55752	3.62442	3.53184	3.52763	3.59355	3.52805	3.53329	3.57001	3.58853	3.54501	3.53885	3.63007
Al(IV)	0.440495	0.476339	0.472728	0.45957	0.483312	0.475866	0.292521	0.456007	0.455027	0.48949	0.464174	0.485816	0.467223	0.491366	0.510521	0.532434	0.422042	0.406584	0.3969	0.521202	0.387435	0.46	0.449209	0.440476	0.397672	0.438877	0.377464	0.405003	0.417091	0.416409	0.47114	0.509556	0.460544	0.411368	0.408011	0.438904	0.416416	0.442482	0.375581	0.468159	0.47237	0.406445	0.471952	0.466715	0.42999	0.411469	0.454992	0.461152	0.369934
Sum(IV)	4	4	4	4	4	4	4	4	4	4	4	4	4	4	4	4	4	4	4	4	4	4	4	4	4	4	4	4	4	4	4	4	4	4	4	4	4	4	4	4	4	4	4	4	4	4	4	4	4
Al(VI)	1.44868	1.4555	1.44873	1.43323	1.47714	1.46885	1.3539	1.47945	1.44825	1.49924	1.50309	1.50279	1.5231	1.52752	1.54167	1.53733	1.44846	1.43325	1.42285	1.47241	1.40919	1.41217	1.472	1.39444	1.36284	1.40497	1.38549	1.4633	1.46593	1.41352	1.49643	1.55185	1.4554	1.408	1.40494	1.42877	1.42569	1.43575	1.39922	1.49228	1.46954	1.43148	1.47239	1.47195	1.39978	1.42709	1.45048	1.45524	1.36363
Ti(VI)	0.0010607	0.00204273	0.00137662	0.00284983	0.00111947	0	4.99363e-05	0.000510161	0.000810281	0	0.000150283	0	0	0.00136693	5.04767e-05	0.000306576	0	0	0	0.00141769	0	0.000662563	0.00242764	0.000304334	0	0.00853245	0.000456591	0	0.0012591	0	0	0	0	0	0	0	0	0.000306058	0	0.000952477	0	0	0.0008028	0.000201918	0.00167218	0.000757423	0.0096529	0.0209925	0.000508681
Fe(VI)	0.0167886	0.0152712	0.0148498	0.0172543	0.0156688	0.0151515	0.0111023	0.015369	0.0150312	0.0182043	0.0168733	0.0156423	0.0152851	0.0132257	0.0118397	0.0142002	0.0163621	0.0168992	0.0150956	0.0198122	0.0155216	0.0156373	0.016417	0.0170848	0.0184392	0.0169179	0.0150015	0.0114713	0.0137168	0.0134194	0.0178069	0.0158585	0.01596	0.0176092	0.0163755	0.01618	0.0189516	0.0184291	0.0144063	0.0144891	0.0148519	0.0169686	0.0144462	0.0146461	0.0163919	0.0168959	0.0145311	0.0146829	0.0170208
Mn(VI)	0	0	0.00017221	0	0	0.000285227	0.00118065	0	0.000285083	0	0.000169198	0	0	0	0.000625127	0	0	0.00114867	0.00147224	0.000399031	0	0.000573811	0	0	0	0.000617953	0	0.000392879	0	0	0	0	0	0.000458762	0.000688644	0	0.000968237	0.00178033	0.000171653	0	0	0	0	0	0	0	0.00016981	0.000961218	0.000629975
Mg(VI)	0.539776	0.547466	0.556587	0.568544	0.517973	0.531027	0.611425	0.499898	0.548421	0.483413	0.466943	0.47701	0.441132	0.450241	0.442101	0.451676	0.531629	0.54374	0.558903	0.529041	0.575593	0.594446	0.505907	0.612305	0.642642	0.585834	0.603277	0.502906	0.494307	0.585401	0.483033	0.42101	0.534564	0.583477	0.589558	0.56922	0.560261	0.55644	0.586206	0.491418	0.529083	0.550699	0.522876	0.520247	0.600151	0.556227	0.522629	0.485642	0.631603
Sum(VI)	2.00631	2.02028	2.02171	2.02187	2.0119	2.01532	1.97766	1.99522	2.0128	2.00086	1.98723	1.99544	1.97952	1.99236	1.99628	2.00351	1.99645	1.99504	1.99832	2.02308	2.0003	2.02349	1.99675	2.02413	2.02392	2.01687	2.00423	1.97806	1.97521	2.01234	1.99727	1.98871	2.00592	2.00955	2.01156	2.01417	2.00587	2.01271	2	1.99914	2.01347	1.99915	2.01051	2.00704	2.01799	2.00097	1.99746	1.97752	2.01339
Ca	0	0.000218196	0.000726147	0.00028991	0	0.00108243	0.000568957	0.0010172	0.00295714	0.00159844	0.0107017	0.0144377	0.00932511	0.000432621	7.18892e-05	0	0.0018794	0.00138041	0.000716297	0	0	0.000798453	0.00100843	0.00397315	0.0100833	0.00191873	0.000289013	0.00255594	0.00322779	0.00261151	0.00259082	0.00339828	0.00247405	0.0021037	0.0024682	0.00590207	0.00381853	0.00217945	0.000361899	0	0.000215408	0	0	0	0.000866011	0.0033081	0.0025777	0.00107288	0.00318765
Na	0.00689917	0.00802838	0.00223381	0.00419688	0.00629472	0.00443977	0.00926607	0.00670538	0.00548165	0.00683676	0.00722974	0.0037694	0.00661994	0.0043057	0.000520352	0.00171189	0.00274687	0.00670498	0.00311084	0.0125268	0.00899613	0.0044659	0.00573512	0.00575173	0.00912313	0.0100304	0.00431465	0.00925026	0.00739845	0.00433189	0.0121113	0.00928952	0.00750548	0.00656339	0.00564863	0.00664254	0.00834399	0.00867647	0.00327439	0.0113692	0.0062367	0.0052882	0.00698276	0.002732	0.00417893	0.00845877	0.01205	0.0125547	0.0120609
K	0.97017	0.967737	0.974133	0.972121	0.97384	0.969777	0.972791	0.97635	0.968171	0.978498	0.957689	0.959489	0.959809	0.971225	0.975527	0.985763	0.97418	0.973783	0.972859	0.987282	0.968645	0.993462	0.971098	0.983458	0.957709	0.969239	0.977716	0.971215	0.984366	0.968667	0.962875	0.964196	0.980845	0.973494	0.969362	0.963344	0.963011	0.967664	0.972361	0.964329	0.969223	0.971382	0.969952	0.97755	0.984976	0.965861	0.973089	0.994182	0.960062
Sum(I)	0.977069	0.975984	0.977093	0.976608	0.980134	0.975299	0.982626	0.984072	0.97661	0.986933	0.975621	0.977697	0.975754	0.975964	0.97612	0.987475	0.978806	0.981868	0.976686	0.999809	0.977642	0.998726	0.977842	0.993183	0.976915	0.981188	0.98232	0.983022	0.994993	0.97561	0.977577	0.976883	0.990825	0.982161	0.977479	0.975888	0.975173	0.97852	0.975997	0.975699	0.975675	0.97667	0.976935	0.980282	0.990021	0.977628	0.987717	1.00781	0.97531
[truncated: 5 more columns]

## Sheet: Table S1. Type2
Table S1. (continued)
Type	Type 2 - Pore-filling type (n=50)
No.	1	2	3	4	5	6	7	8	9	10	11	12	13	14	15	16	17	18	19	20	21	22	23	24	25	26	27	28	29	30	31	32	33	34	35	36	37	38	39	40	41	42	43	44	45	46	47	48	49
Chemical composition (wt. %)
SiO2	52.1	54.61	54.634	53.259	52.633	52.578	54.038	54.43	54.288	54.162	54.151	54.374	53.64	53.934	53.104	54.336	53.568	54.647	53.559	55.559	54.258	53.808	53.59	54.292	54.055	54.458	53.588	53.623	52.731	53.474	55.075	52.785	53.144	52.873	53.849	53.972	54.37	54.008	54.668	52.243	52.648	52.377	53.452	53.083	54.063	53.511	54.141	53.075	52.763
TiO2	0	0.009	0	0	0	0.013	0.035	0	0.031	0	0	0.009	0.009	0	0	0.02	0.006	0.032	0.047	0	0.031	0.012	0	0	0	0	0	0	0.016	0.004	0	0	0	0	0.012	0.026	0	0	0.01	0.01	0.012	0	0.021	0.006	0	0.156	0.126	0.265	0.203
Al2O3	23.411	23.293	23.165	24.531	23.266	23.967	23.135	23.197	23.121	22.799	22.433	23.006	22.686	22.429	22.513	22.292	22.926	21.849	22.574	21.448	22.0697	22.083	22.045	22.082	22.005	22.532	22.763	22.132	22.748	22.459	22.056	22.833	22.428	23.432	22.383	22.087	21.002	21.453	21.267	24.404	24.328	24.397	24.53	24.205	24.035	24.277	22.884	22.099	22.799
FeO	0.261	0.218	0.198	0.185	0.242	0.218	0.261	0.222	0.231	0.232	0.202	0.258	0.242	0.237	0.201	0.212	0.212	0.247	0.213	0.23	0.21	0.218	0.21	0.239	0.194	0.199	0.249	0.26	0.231	0.202	0.234	0.239	0.189	0.213	0.214	0.212	0.195	0.249	0.235	0.191	0.189	0.203	0.219	0.223	0.214	0.282	0.341	0.319	0.362
MnO	0.004	0	0	0.004	0.001	0.015	0.003	0	0	0.012	0	0	0	0.025	0.024	0.001	0.005	0.01	0	0.02	0.023	0	0	0.011	0.003	0	0.011	0.023	0.018	0	0.015	0.015	0	0	0.018	0	0.007	0	0.025	0	0.006	0	0	0.003	0	0	0.01	0	0.003
MgO	5.796	5.858	5.812	5.114	5.65	4.927	5.75	5.879	5.461	5.711	6.126	5.887	5.677	6.207	6.199	6.167	6.215	6.842	6.211	6.432	6.66	6.512	6.441	6.29	6.028	6.525	6.274	6.029	6.136	6.286	6.04	6.033	6.166	5.837	6.017	6.562	6.81	6.72	7.01	4.846	4.584	4.988	5.037	4.997	5.105	4.84	5.762	6.261	5.273
CaO	0.009	0.062	0.017	0.085	0.043	0.078	0.043	0.082	0.041	0.021	0.044	0.034	0.073	0.012	0.032	0.028	0.041	0.031	0.027	0.059	0.008	0.001	0.025	0.041	0.082	0.051	0.054	0.051	0.038	0.012	0.031	0.037	0.031	0.091	0.077	0.029	0.028	0.022	0.023	0.054	0.058	0.031	0.082	0.072	0.045	0.108	0.057	0.066	0.092
Na2O	0.026	0.053	0.079	0.05	0.063	0.051	0.024	0.126	0.084	0.08	0.091	0.027	0.081	0.04	0.07	0.063	0.072	0.068	0.075	0.071	0.084	0.064	0.057	0.048	0.056	0.079	0.069	0.057	0.085	0.061	0.046	0.048	0.037	0.077	0.051	0.039	0.044	0.043	0.049	0.051	0.031	0.054	0.043	0.064	0.048	0.077	0.091	0.107	0.106
K2O	11.432	11.351	11.321	11.332	11.601	11.259	11.546	11.341	11.351	11.328	11.249	11.626	11.144	11.348	11.231	11.443	11.319	11.565	11.414	11.445	11.388	11.452	11.305	11.326	11.207	11.409	11.315	11.213	11.162	11.317	11.239	11.179	11.211	11.193	11.325	11.302	11.22	11.419	11.409	11.328	11.221	11.217	10.991	10.682	10.601	11.379	11.414	11.049	10.988
Sum	93.039	95.454	95.226	94.56	93.499	93.106	94.835	95.277	94.608	94.345	94.296	95.221	93.552	94.232	93.374	94.562	94.364	95.291	94.12	95.264	94.7317	94.15	93.673	94.329	93.63	95.253	94.323	93.388	93.165	93.815	94.736	93.169	93.206	93.716	93.946	94.229	93.676	93.914	94.696	93.127	93.077	93.267	94.375	93.335	94.111	94.63	94.826	93.241	92.589
Structural formula (O=11)
Si(IV)	3.54255	3.60385	3.61235	3.54985	3.56219	3.56131	3.59698	3.60111	3.61488	3.61797	3.61945	3.6052	3.61257	3.61132	3.59024	3.62519	3.58303	3.62427	3.59422	3.67575	3.61597	3.61058	3.61156	3.62996	3.63776	3.60754	3.58709	3.62186	3.57388	3.59788	3.65834	3.57625	3.59727	3.56021	3.6161	3.61418	3.65973	3.63319	3.64529	3.53948	3.56235	3.5405	3.56058	3.57008	3.59848	3.56579	3.60415	3.59411	3.59347
Al(IV)	0.457454	0.39615	0.387647	0.450152	0.437808	0.438693	0.403022	0.398895	0.385121	0.382031	0.380553	0.3948	0.387429	0.388683	0.409762	0.374809	0.41697	0.375733	0.405782	0.324253	0.384034	0.389424	0.388441	0.370035	0.362237	0.392459	0.412912	0.378141	0.426118	0.402116	0.341663	0.423751	0.402732	0.439788	0.383896	0.385821	0.340269	0.366812	0.354705	0.460519	0.437647	0.459504	0.439415	0.429916	0.401525	0.434215	0.395853	0.405887	0.406526
Sum(IV)	4	4	4	4	4	4	4	4	4	4	4	4	4	4	4	4	4	4	4	4	4	4	4	4	4	4	4	4	4	4	4	4	4	4	4	4	4	4	4	4	4	4	4	4	4	4	4	4	4
Al(VI)	1.41863	1.41551	1.41751	1.47687	1.41801	1.47457	1.41192	1.40988	1.42936	1.41287	1.38662	1.40297	1.41327	1.3813	1.38408	1.37805	1.39032	1.33208	1.37962	1.34812	1.34942	1.35697	1.36252	1.37001	1.38308	1.3667	1.3829	1.38366	1.39096	1.37883	1.38502	1.39945	1.38649	1.41976	1.38759	1.35732	1.32585	1.33407	1.31662	1.48811	1.50242	1.48414	1.48638	1.48868	1.48394	1.4724	1.39956	1.35783	1.4235
Ti(VI)	0	0.000446825	0	0	0	0.000662443	0.0017527	0	0.00155293	0	0	0.000448932	0.000456006	0	0	0.00100386	0.000301923	0.00159663	0.00237285	0	0.00155426	0.000605775	0	0	0	0	0	0	0.00081582	0.000202472	0	0	0	0	0.00060624	0.00130983	0	0	0.000501649	0.000509696	0.000610853	0	0.00105239	0.000303581	0	0.00782054	0.00631025	0.0135004	0.0104011
Fe(VI)	0.0148418	0.0120315	0.0109486	0.0103123	0.0136975	0.0123489	0.0145294	0.0122834	0.0128638	0.0129606	0.0112916	0.0143063	0.0136305	0.0132715	0.0113648	0.011829	0.011859	0.0136999	0.0119542	0.0127259	0.0117044	0.0122336	0.0118358	0.0133639	0.0109186	0.0110248	0.0139393	0.0146866	0.0130935	0.0113664	0.0129991	0.013542	0.0106991	0.0119947	0.0120184	0.0118726	0.0109772	0.0140087	0.013105	0.0108221	0.0106951	0.0114759	0.0122003	0.0125428	0.0119124	0.0157155	0.0189845	0.0180659	0.0206187
Mn(VI)	0.000230369	0	0	0.00022582	5.73251e-05	0.000860562	0.00016914	0	0	0.000678948	0	0	0	0.00141784	0.00137434	5.65104e-05	0.00028327	0.000561745	0	0.00112074	0.0012983	0	0	0.000622938	0.000171004	0	0.000623667	0.00131581	0.00103331	0	0.000843929	0.000860783	0	0	0.00102381	0	0.000399092	0	0.00141197	0	0.000343868	0	0	0.000170895	0	0	0.000563847	0	0.000173058
Mg(VI)	0.587509	0.576305	0.572877	0.508143	0.570054	0.497504	0.570578	0.579842	0.542089	0.56871	0.61041	0.58189	0.569974	0.619574	0.624779	0.613374	0.619719	0.676465	0.621358	0.634375	0.661673	0.651407	0.647102	0.62694	0.604756	0.644375	0.626077	0.607064	0.619966	0.630503	0.598101	0.609339	0.622201	0.585923	0.602354	0.655067	0.683354	0.673919	0.696829	0.489444	0.46239	0.502642	0.500193	0.501004	0.50655	0.480802	0.571818	0.632054	0.535367
Sum(VI)	2.02122	2.00429	2.00134	1.99555	2.00182	1.98595	1.99895	2.00201	1.98586	1.99522	2.00832	1.99962	1.99733	2.01556	2.0216	2.00432	2.02249	2.02441	2.0153	1.99634	2.02565	2.02122	2.02146	2.01094	1.99893	2.0221	2.02353	2.00673	2.02587	2.0209	1.99696	2.0232	2.01939	2.01768	2.00359	2.02557	2.02058	2.02199	2.02847	1.98888	1.97646	1.99825	1.99983	2.0027	2.0024	1.97674	1.99723	2.02145	1.99006
Ca	0.000655682	0.00438389	0.00120434	0.00607028	0.00311818	0.00566074	0.00306676	0.00581279	0.00292514	0.00150301	0.0031511	0.00241541	0.00526773	0.000860909	0.00231803	0.00200159	0.00293834	0.00220287	0.00194137	0.00418231	0.000571247	7.18957e-05	0.0018052	0.00293713	0.0059127	0.00361987	0.00387295	0.00369083	0.0027595	0.000865085	0.0022063	0.00268591	0.0022483	0.00656533	0.00554022	0.00208071	0.00201939	0.00158572	0.00164324	0.00391993	0.00420491	0.00224522	0.00585254	0.00518834	0.00320925	0.00771097	0.0040656	0.00478871	0.00671345
Na	0.00342766	0.00678136	0.0101275	0.0064615	0.00826697	0.00669764	0.00309739	0.0161627	0.0108447	0.0103611	0.011793	0.00347095	0.0105769	0.00519289	0.00917573	0.00814949	0.00933736	0.00874398	0.00975842	0.00910743	0.0108539	0.00832638	0.00744787	0.00622235	0.0073069	0.0101467	0.00895509	0.00746452	0.0111697	0.00795758	0.00592425	0.00630529	0.00485587	0.0100526	0.00664018	0.00506352	0.00574234	0.00560847	0.00633493	0.00669928	0.0040669	0.00707724	0.00555357	0.00834544	0.0061945	0.00994831	0.0117453	0.0140486	0.0139971
K	0.99165	0.955624	0.954928	0.963567	1.00164	0.97289	0.980457	0.95721	0.964234	0.965344	0.959198	0.983393	0.957475	0.96935	0.968664	0.973961	0.965854	0.978494	0.977166	0.965974	0.968203	0.980324	0.971941	0.966055	0.962158	0.964175	0.966246	0.966186	0.965105	0.971392	0.952391	0.966226	0.968103	0.961495	0.970197	0.965506	0.963477	0.979978	0.970522	0.979091	0.968602	0.967295	0.934013	0.916503	0.900168	0.96733	0.969332	0.954516	0.95469
Sum(I)	0.995733	0.96679	0.96626	0.976099	1.01303	0.985248	0.986621	0.979186	0.978004	0.977208	0.974142	0.989279	0.973319	0.975404	0.980157	0.984112	0.97813	0.989441	0.988866	0.979264	0.979629	0.988722	0.981195	0.975214	0.975378	0.977941	0.979074	0.977341	0.979035	0.980214	0.960522	0.975217	0.975207	0.978113	0.982377	0.97265	0.971238	0.987172	0.978501	0.989711	0.976874	0.976617	0.94542	0.930037	0.909572	0.984989	0.985143	0.973353	0.9754
[truncated: 5 more columns]

## Sheet: Table S1. Type3
Table S1. (continued)
Type	Type 3 - Well-crystallized type (n=30)																																Type 3 (n=30)
No.	1	2	3	4	5	6	7	8	9	10	11	12	13	14	15	16	17	18	19	20	21	22	23	24	25	26	27	28	29	30			Min.	Max.	Average
Chemical composition (wt. %)																																Chemical composition (wt. %)
SiO2	50.754	49.131	50.318	48.656	48.812	51.228	51.345	49.206	48.834	49.576	50.179	49.033	50.282	49.924	50.361	50.006	50.107	50.482	49.585	49.144	49.803	50.008	50.203	50.236	49.663	50.072	49.399	49.951	50.802	50.134		SiO2	48.656	51.345	49.9078
TiO2	0.236	0.312	0.359	0.375	0.287	0.303	0.274	0.192	0.238	0.423	0.284	0.241	0.248	0.383	0.464	0.5	0.437	0.48	0.369	0.342	0.355	0.271	0.411	0.498	0.402	0.409	0.445	0.403	0.13	0.182		TiO2	0.13	0.5	0.341767
Al2O3	28.384	28.535	28.302	27.983	28.499	26.011	26.459	28.374	29.122	27.828	28.335	27.957	26.257	27.487	28.071	28.296	28.192	28.274	28.045	28.226	28.042	28.114	26.568	27.777	27.659	27.266	27.608	27.999	28.165	27.081		Al2O3	26.011	29.122	27.8305
FeO	0.114	0.119	0.102	0.103	0.122	0.096	0.112	0.171	0.117	0.089	0.101	0.1	0.115	0.141	0.141	0.085	0.12	0.08	0.106	0.088	0.107	0.126	0.099	0.088	0.117	0.109	0.104	0.107	0.241	0.221		FeO	0.08	0.241	0.118033
MnO	0	0.021	0	0	0	0	0	0	0.002	0	0.004	0	0.005	0.008	0	0.003	0.006	0.01	0	0	0.022	0	0	0	0	0.022	0	0.014	0.023	0.007		MnO	0	0.023	0.0049
MgO	3.774	3.731	3.662	4.414	3.345	4.897	5.053	4.05	3.615	3.785	3.483	3.655	4.706	3.764	3.772	3.586	3.635	3.444	3.179	3.809	3.875	3.987	3.877	3.363	4.057	3.772	3.815	3.728	3.896	3.992		MgO	3.179	5.053	3.85737
CaO	0.12	0.083	0.073	0.117	0.106	0.113	0.078	0.184	0.155	0.087	0.106	0.631	0.086	0.09	0.078	0.104	0.121	0.234	0.08	0.082	0.084	0.096	0.089	0.137	0.099	0.116	0.11	0.149	0.205	0.191		CaO	0.073	0.631	0.133467
Na2O	0.198	0.158	0.152	0.144	0.151	0.199	0.122	0.336	0.15	0.145	0.146	0.14	0.144	0.109	0.234	0.244	0.192	0.274	0.111	0.139	0.137	0.137	0.119	0.158	0.144	0.122	0.159	0.151	0.111	0.229		Na2O	0.109	0.336	0.165167
K2O	11.19	11.282	11.317	11.08	11.201	11.206	11.226	10.828	11.038	11.17	11.107	10.998	11.094	10.993	10.97	10.882	10.972	10.904	10.997	10.963	11.21	11.307	11.088	10.966	11.103	10.996	10.979	11.07	11.251	11.032		K2O	10.828	11.317	11.0807
Sum	94.77	93.372	94.285	92.872	92.523	94.053	94.669	93.341	93.271	93.103	93.745	92.755	92.937	92.899	94.091	93.706	93.782	94.182	92.472	92.793	93.635	94.046	92.454	93.223	93.244	92.884	92.619	93.572	94.824	93.069		Sum	92.454	94.824	93.4397
Structural formula (O=11)																																Structural formula (O=11)
Si(IV)	3.37906	3.32999	3.3709	3.31721	3.33641	3.44152	3.42576	3.33144	3.30873	3.36502	3.37601	3.34568	3.41885	3.39058	3.37593	3.36439	3.37009	3.37874	3.38065	3.34376	3.36151	3.36194	3.42707	3.39623	3.36591	3.40097	3.36831	3.37025	3.38425	3.40369		Si(IV)	3.30873	3.44152	3.37303
Al(IV)	0.620939	0.670009	0.629098	0.682786	0.663594	0.558479	0.574238	0.668565	0.69127	0.634976	0.623993	0.654324	0.581145	0.609417	0.624073	0.635606	0.629912	0.621259	0.619353	0.65624	0.638494	0.638062	0.572933	0.603774	0.63409	0.599025	0.631689	0.629749	0.615747	0.596314		Al(IV)	0.558479	0.69127	0.626972
Sum(IV)	4	4	4	4	4	4	4	4	4	4	4	4	4	4	4	4	4	4	4	4	4	4	4	4	4	4	4	4	4	4		Sum(IV)	4	4	4
Al(VI)	1.60624	1.60939	1.60548	1.56568	1.63222	1.50099	1.50636	1.5955	1.63423	1.59117	1.62279	1.59391	1.52297	1.59071	1.59367	1.6081	1.60482	1.60903	1.63416	1.6072	1.59222	1.58949	1.56457	1.60943	1.57524	1.58363	1.58694	1.59672	1.59555	1.57058		Al(VI)	1.50099	1.63423	1.58997
Ti(VI)	0.0118206	0.015909	0.0180933	0.019234	0.0147582	0.0153139	0.0137534	0.00977946	0.0121315	0.0216002	0.0143747	0.0123712	0.0126859	0.0195688	0.0234	0.0253078	0.0221118	0.0241691	0.0189267	0.0175062	0.0180263	0.0137063	0.0211074	0.0253286	0.0204973	0.0208993	0.0228273	0.0204561	0.00651517	0.00929584		Ti(VI)	0.00651517	0.0253286	0.0173825
Fe(VI)	0.00634744	0.00674532	0.00571467	0.00587276	0.00697397	0.00539365	0.0062495	0.00968228	0.00662969	0.00505213	0.00568291	0.00570642	0.00653934	0.00800852	0.00790471	0.00478269	0.00674982	0.00447792	0.00604399	0.00500743	0.00603991	0.00708417	0.00565192	0.00497545	0.00663168	0.0061916	0.00593056	0.00603768	0.0134266	0.0125481		Fe(VI)	0.00447792	0.0134266	0.00666943
Mn(VI)	0	0.00120557	0	0	0	0	0	0	0.000114777	0	0.000227943	0	0.000287954	0.000460194	0	0.000170959	0.000341806	0.000566896	0	0	0.00125773	0	0	0	0	0.00126566	0	0.000800077	0.00129776	0.000402532		Mn(VI)	0	0.00129776	0.000279995
Mg(VI)	0.374573	0.376983	0.365721	0.448619	0.340845	0.490435	0.502593	0.408768	0.365137	0.382993	0.349336	0.371785	0.477011	0.381086	0.376946	0.35967	0.364465	0.343629	0.323109	0.386353	0.389905	0.399581	0.394546	0.338935	0.409905	0.381934	0.38779	0.374975	0.38691	0.404032		Mg(VI)	0.323109	0.502593	0.388619
Sum(VI)	1.99898	2.01023	1.99501	2.03941	1.9948	2.01214	2.02896	2.02373	2.01824	2.00082	1.99241	1.98377	2.01949	1.99984	2.00192	1.99803	1.99848	1.98187	1.98224	2.01607	2.00745	2.00986	1.98588	1.97867	2.01228	1.99392	2.00349	1.99899	2.0037	1.99686		Sum(VI)	1.97867	2.03941	2.00292
Ca	0.00856013	0.00602752	0.00523985	0.00854665	0.00776303	0.00813382	0.00557605	0.0133476	0.0112524	0.00632716	0.00764118	0.0461315	0.00626527	0.00654909	0.0056023	0.00749706	0.0087197	0.0167806	0.00584403	0.00597794	0.00607478	0.00691504	0.00650963	0.00992374	0.00718915	0.00844189	0.00803637	0.0107715	0.0146322	0.0138939		Ca	0.00523985	0.0461315	0.00967237
Na	0.0255586	0.020763	0.019743	0.0190347	0.0200113	0.0259205	0.0157821	0.0441061	0.019705	0.0190823	0.019045	0.0185212	0.0189835	0.0143528	0.0304131	0.0318289	0.0250375	0.0355562	0.014673	0.0183369	0.0179286	0.0178574	0.0157502	0.0207102	0.0189225	0.0160663	0.0210202	0.0197534	0.0143368	0.0301439		Na	0.0143368	0.0441061	0.0216315
K	0.950418	0.975511	0.967192	0.963686	0.976714	0.9604	0.955526	0.935234	0.954087	0.967227	0.953316	0.957343	0.96231	0.952445	0.938132	0.934011	0.941428	0.931028	0.956494	0.951596	0.965256	0.969742	0.965617	0.945776	0.959994	0.9528	0.955026	0.952849	0.956162	0.955498		K	0.931028	0.976714	0.955427
Sum(I)	0.984536	1.0023	0.992175	0.991267	1.00449	0.994454	0.976884	0.992687	0.985044	0.992636	0.980002	1.022	0.987558	0.973347	0.974147	0.973337	0.975185	0.983365	0.977011	0.975911	0.98926	0.994514	0.987876	0.97641	0.986105	0.977308	0.984083	0.983374	0.985131	0.999536		Sum(I)	0.973337	1.022	0.986731

## Sheet: Table S2.
Table S2. LA-ICPMS analysis of phengite
Sample Number	La	Ce	Pr	Nd	Sm	Eu	Gd	Tb	Dy	Ho	Er	Tm	Yb	Lu
Type1 - Polycrystalline aggregate type
T1-1	3.78	7.44	0.852	2.45	1.15	0.261	1.1	0.117	1.11	0.141	0.35	0.141	0.46	0.099
T1-2	3.18	6.05	0.715	2.17	1.14	0.29	0.84	0.139	0.69	0.155	0.39	0.11	0.63	0.17
T1-3	2.62	5.8	0.5	2.61	0.95	0.35	0.77	0.179	0.66	0.167	0.69	0.13	0.83	0.164
T1-4	2.3	4.76	0.465	2.25	1.26	0.28	0.9	0.191	0.68	0.149	0.36	0.175	0.63	0.162
T1-5	1.41	3	0.423	0.95	1.23	0.32	0.79	0.168	0.87	0.152	0.52	0.179	0.57	0.147
T1-6	1.5	3.23	0.241	1.18	1.75	0.39	1.9	0.122	0.73	0.179	0.56	0.178	1.06	0.193
T1-7	1.34	2.76	0.262	1.06	1.65	0.31	1.72	0.213	0.91	0.182	0.64	0.29	0.94	0.24
Type2 - Pore-filling type
T2-1	0.294	0.3	0.215	0.83	2.12	0.244	1.06	0.258	0.8	0.199	0.39	0.3	0.75	0.194
T2-2	0.193	0.22	0.143	1.33	1.46	0.39	0.92	0.112	0.51	0.169	0.4	0.14	0.53	0.167
T2-3	0.186	0.211	0.111	1.07	0.64	0.14	0.88	0.17	0.8	0.254	0.5	0.205	0.5	0.179
T2-4	0.2	0.202	0.188	1.25	0.76	0.212	1.23	0.164	0.6	0.226	0.48	0.235	0.76	0.149
T2-5	0.245	0.175	0.118	0.51	1.71	0.258	1.23	0.109	0.34	0.239	0.41	0.203	0.54	0.086
T2-6	0.101	0.25	0.146	1.24	1.28	0.3	0.95	0.14	0.75	0.167	0.35	0.162	0.38	0.122
T2-7	0.3	0.185	0.153	0.92	1.58	0.223	0.8	0.084	0.85	0.195	0.45	0.168	0.8	0.09
Type3 - Well-crystallized type
T3-1	0.199	0.161	0.275	0.71	1.18	0.172	0.9	0.155	0.34	0.242	0.51	0.11	0.78	0.166
T3-2	0.107	0.108	0.153	0.99	0.88	0.233	1.58	0.174	1.15	0.087	0.5	0.147	0.74	0.203
T3-3	0.244	0.247	0.202	0.91	1	0.44	1.46	0.178	0.66	0.163	0.63	0.224	0.88	0.187
T3-4	0.104	0.3	0.192	0.9	1.45	0.27	1.19	0.139	0.34	0.089	0.5	0.142	0.79	0.086
T3-5	0.234	0.475	0.15	1.04	1.58	0.39	0.75	0.138	0.41	0.093	0.56	0.165	0.6	0.191
T3-6	0.251	0.231	0.17	0.52	1.16	0.154	0.9	0.076	0.57	0.166	0.55	0.18	1.13	0.185
T3-7	0.212	0.185	0.144	0.7	0.71	0.35	0.76	0.154	0.77	0.173	0.5	0.185	0.66	0.208
T3-8	0.126	0.236	0.15	0.85	1.29	0.215	1.41	0.153	0.48	0.148	0.43	0.164	0.92	0.223
